# Supplementary material
Source: PubMed Central journal article supplement (PMC11416063)
Supplement: NIHMS2006571-supplement-Supplementary_Material.pdf [file NIHMS2006571-supplement-Supplementary_Material.pdf]

## Supplementary Figure S1

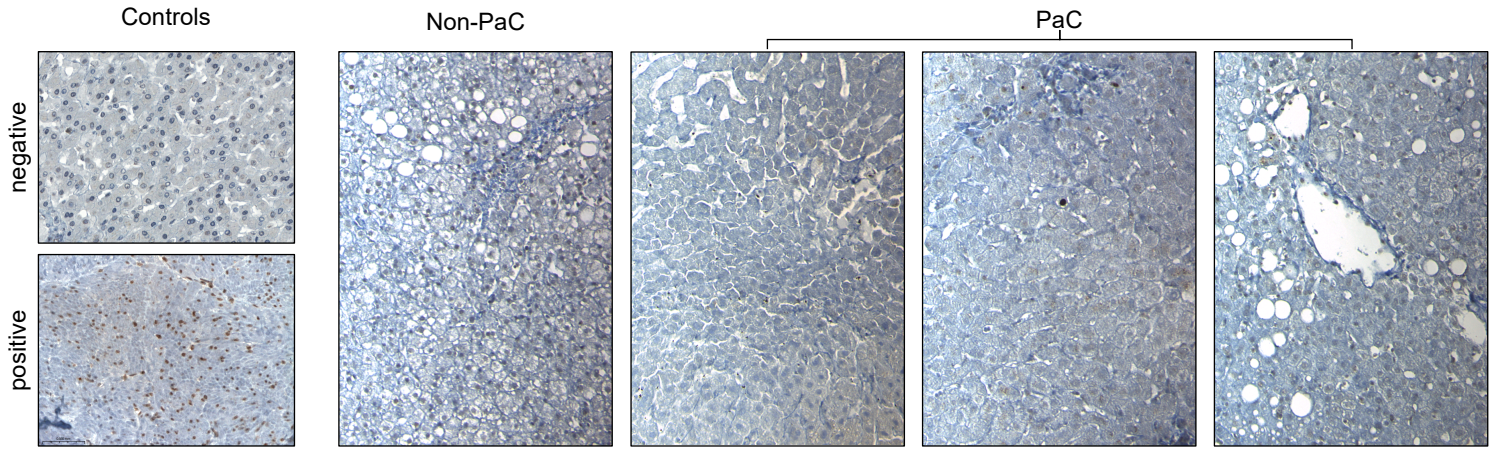

**Fig. S1 | Immunohistochemical staining for p53.** Liver biopsies were evaluated by H&E and p53 immunohistochemical staining, without identification of micrometastases. Representative sections from one Non-PaC and three PaC patients are shown. Rare hepatocytes (as shown in the middle PaC panel) or biliary epithelial cells were noted to stain positively for p53, but no malignant cells were identified. Unrelated normal liver tissue and a colon cancer case were used as negative and positive controls (left panels).

1 **Supplementary Tables**2 **Supplementary Table S1. Clinicopathological characteristics of all patients**

| Variable                                     | Non-PaC |             | PaC                            |    | %           |
|----------------------------------------------|---------|-------------|--------------------------------|----|-------------|
|                                              |         | %           |                                |    |             |
| <b>Patients in group</b>                     | 19      |             | 49                             |    |             |
| <b>Male</b>                                  | 8       | 42%         | 32                             |    | 65%         |
| <b>Age - Median (Range)</b>                  | 69.6    | (48.7-86.8) | 68.0                           |    | (49.0-87.0) |
| <b>BMI - Median (Range)</b>                  | 29.1    | (20.4-37.8) | 26.9                           |    | (19.5-39.0) |
| <b>Biliary obstruction*</b>                  | 2       | 11%         | 31                             |    | 63%         |
| <b>Preop. Biliary drainage</b>               | 1       | 5%          | 20                             |    | 41%         |
| <b>Histologic subtype</b>                    |         |             |                                |    |             |
| IPMN                                         | 10      | 56%         | Conventional PDAC              | 40 | 82%         |
| PanIN 1-2 +/- retention cyst                 | 4       | 22%         | Adenosquamous PDAC             | 7  | 14%         |
| Low grade PaNET                              | 2       | 11%         | Undifferentiated anaplastic Ca | 1  | 2%          |
| Serous cystadenoma                           | 1       | 5.5%        | Pancreatobiliary Ca            | 1  | 2%          |
| Ampullary adenoma                            | 2       | 11%         |                                |    |             |
| <b>IPMN Grade</b>                            |         |             |                                |    |             |
| Low                                          | 4       | 22%         | <b>PaC Differentiation</b>     |    |             |
| Intermediate                                 | 4       | 22%         | Well                           | 2  | 4%          |
| High                                         | 3       | 17%         | Moderate                       | 30 | 61%         |
|                                              |         |             | Poor                           | 15 | 31%         |
|                                              |         |             | Undifferentiated               | 1  | 2%          |
|                                              |         |             | Unspecified                    | 1  | 2%          |
| <b>T-stage (per AJCC 8<sup>th</sup> ed.)</b> |         |             |                                |    |             |
|                                              |         |             | 1 ( $\leq 2$ cm)               | 5  | 10%         |
|                                              |         |             | 2 ( $> 2$ and $\leq 4$ cm)     | 33 | 67%         |
|                                              |         |             | 3 ( $> 4$ cm)                  | 10 | 21%         |
|                                              |         |             | 4 (invasion of great vessels)  | 1  | 2%          |
| <b>N-stage (per AJCC 8<sup>th</sup> ed.)</b> |         |             |                                |    |             |
|                                              |         |             | 0 (LN -ve)                     | 14 | 29%         |
|                                              |         |             | 1 (1-3 +ve LNs)                | 19 | 39%         |
|                                              |         |             | 2 ( $> 3$ +ve LNs)             | 16 | 33%         |
| <b>Lymphovascular invasion</b>               | -       |             |                                | 37 | 76%         |
| <b>Perineural invasion</b>                   | -       |             |                                | 48 | 98%         |

\* Biliary obstruction was defined by the presence of either (a) clinical/biochemical (based on abnormal total bilirubin) evidence of jaundice, or (b) preoperative biliary drainage procedure for the relief of biliary obstruction.

3  
4  
5

6

7 **Supplementary Table S2. Genes deregulated in bulk liver specimens from PaC**  
 8 **patients compared to Non-PaC controls**

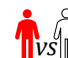

| UP-REGULATED |                  |                      | DOWN-REGULATED |                  |                      |
|--------------|------------------|----------------------|----------------|------------------|----------------------|
| Gene         | logFold $\Delta$ | Adj. <i>p</i> -value | Gene           | logFold $\Delta$ | Adj. <i>p</i> -value |
| SLC51B       | 3.93787948       | 0.00448147           | CYP17A1        | -1.0103352       | 0.07589972           |
| TRIM31       | 3.49098287       | 0.00397538           | LGR6           | -1.0234902       | 0.06223514           |
| AKR1B10      | 2.97314024       | 0.01446193           | TMEM100        | -1.0375946       | 0.00397538           |
| DBNDD1       | 2.88751556       | 0.00174362           | DND1           | -1.0509621       | 0.0962492            |
| LOXL4        | 2.64932872       | 0.00364002           | NDRG4          | -1.0518643       | 0.04026881           |
| CCL20        | 2.52647527       | 0.02737509           | SCN7A          | -1.0709203       | 0.03969302           |
| HS3ST2       | 2.45403359       | 0.00740081           | PRIMA1         | -1.0788986       | 0.09587573           |
| KCNJ5        | 2.21516757       | 0.00019795           | PRSS35         | -1.1045353       | 0.04608003           |
| CCAT1        | 2.17740423       | 0.00099447           | EDAR           | -1.1435971       | 0.03464416           |
| TREM2        | 2.16918565       | 0.02317979           | GPR153         | -1.2163746       | 0.03488404           |
| UBD          | 2.16910164       | 0.00397538           | COL28A1        | -1.2183629       | 0.00986282           |
| HKDC1        | 2.00760492       | 0.06612741           | LDLRAD4-AS1    | -1.2400806       | 0.07411398           |
| MMP7         | 1.89845078       | 0.01197887           | GACT           | -1.2525449       | 0.00059414           |
| ROS1         | 1.87763751       | 0.02080977           | MAMDC2         | -1.2538878       | 0.04718306           |
| DTNA         | 1.84022918       | 0.01394864           | DDIT4          | -1.2970125       | 0.03964432           |
| KB-1615E4.2  | 1.70741829       | 0.01846313           | GRIK3          | -1.3524865       | 0.09685178           |
| FAM169B      | 1.65426671       | 0.04742395           | CSPG4          | -1.3737184       | 0.04986076           |
| GDF15        | 1.64302043       | 0.02788377           | NEGR1          | -1.3771335       | 0.0962492            |
| GPNMB        | 1.58404955       | 0.0049062            | ATP1A2         | -1.4016051       | 0.03464416           |
| CFTR         | 1.56449261       | 0.01283695           | CBLN3          | -1.4528987       | 0.06462747           |
| TTC9         | 1.54047658       | 0.01101693           | GPM6B          | -1.4540314       | 0.01509086           |
| CAPG         | 1.51911956       | 0.03916409           | MROH2A         | -1.4806942       | 0.05843885           |
| CCL18        | 1.50330877       | 0.0962492            | NRXN1          | -1.5111126       | 0.07650124           |
| IQGAP3       | 1.50251607       | 0.03484719           | L1CAM          | -1.5306355       | 0.09035285           |
| VTCN1        | 1.44951155       | 0.09703832           | SORCS1         | -1.5340123       | 0.06925869           |
| CXCL10       | 1.44638522       | 0.07703202           | RNF157         | -1.5841558       | 0.02164629           |
| PCDP1        | 1.35769229       | 0.02537807           | SLC5A7         | -1.7322185       | 0.09577506           |
| ANLN         | 1.35474966       | 0.08072348           | SLC26A3        | -1.7886442       | 0.08350883           |
| RGS4         | 1.35095853       | 0.02737509           | XKR4           | -1.8827735       | 0.0251224            |
| RAB42        | 1.33778471       | 0.02080977           | SPOCK3         | -1.9496298       | 0.05907239           |
| PLA2G7       | 1.33148196       | 0.00059414           | SCUBE1         | -2.2067337       | 0.00174362           |
| FOXM1        | 1.33053878       | 0.08072348           | AC004593.3     | -2.7687667       | 0.00239657           |
| CLSPN        | 1.31353181       | 0.08350536           |                |                  |                      |
| SERPINE1     | 1.30110444       | 0.05907239           |                |                  |                      |
| KNDC1        | 1.23685908       | 0.08529973           |                |                  |                      |
| TMEM45B      | 1.21427725       | 0.03068519           |                |                  |                      |
| IL32         | 1.19596025       | 0.09042697           |                |                  |                      |
| EYS          | 1.19356936       | 0.06999612           |                |                  |                      |
| MKI67        | 1.17803338       | 0.06612741           |                |                  |                      |
| TLR7         | 1.09348062       | 0.09614234           |                |                  |                      |
| IGSF3        | 1.06421415       | 0.08350536           |                |                  |                      |
| IFIT2        | 1.0504882        | 0.04026881           |                |                  |                      |
| AJUBA        | 1.02782625       | 0.0403852            |                |                  |                      |
| ADM2         | 1.02233956       | 0.04986076           |                |                  |                      |

9 Comparisons performed with the Wald test implemented using the DESeq2 package, with adjustment for multiple  
 10 comparisons.  
 11

12 **Supplementary Table S3. Gene set enrichment analysis (GSEA) in bulk liver**  
 13 **specimens from PaC patients compared to Non-PaC controls**

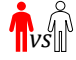

14

15 **A. Enriched in PaC**

|   | <b>Gene Set</b><br><i>(follow link to MSigDB)</i>  | <b>SIZE</b> | <b>ES</b> | <b>NES</b> | <b>NOM<br/>p-val</b> | <b>FDR<br/>q-val</b> | <b>FWER<br/>p-val</b> | <b>RANK<br/>AT MAX</b> |
|---|----------------------------------------------------|-------------|-----------|------------|----------------------|----------------------|-----------------------|------------------------|
| 1 | <a href="#">HALLMARK MITOTIC SPINDLE</a>           | 197         | 0.45      | 1.70       | 0.020                | 0.504                | 0.225                 | 4943                   |
| 2 | <a href="#">HALLMARK INTERFERON GAMMA RESPONSE</a> | 197         | 0.59      | 1.69       | 0.020                | 0.270                | 0.237                 | 4958                   |
| 3 | <a href="#">HALLMARK ALLOGRAFT REJECTION</a>       | 191         | 0.53      | 1.66       | 0.043                | 0.240                | 0.288                 | 6240                   |
| 4 | <a href="#">HALLMARK INTERFERON ALPHA RESPONSE</a> | 93          | 0.62      | 1.61       | 0.036                | 0.208                | 0.367                 | 6063                   |

16

17 **B. Enriched in Non-PaC**

18 none

19

20



21 **Supplementary Table S4. Gene set enrichment analysis (GSEA) in bulk liver**  
 22 **specimens from PaC patients comparing patients with distant recurrence to**  
 23 **those with no evidence of disease (NED).**

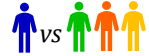

24  
25

#### Enriched in patients with distant recurrence

|   | <b>Gene Set</b><br><i>(follow link to MSigDB)</i> | <b>SIZE</b> | <b>ES</b> | <b>NES</b> | <b>NOM<br/>p-val</b> | <b>FDR<br/>q-val</b> | <b>FWER<br/>p-val</b> | <b>RANK<br/>AT MAX</b> |
|---|---------------------------------------------------|-------------|-----------|------------|----------------------|----------------------|-----------------------|------------------------|
| 1 | HALLMARK_PI3K_AKT_MTOR_SIGNALING                  | 100         | 0.39      | 1.55       | 0.036                | 0.242                | 0.446                 | 9149                   |
| 2 | HALLMARK_E2F_TARGETS                              | 195         | 0.49      | 1.54       | 0.093                | 0.233                | 0.471                 | 7305                   |
| 3 | HALLMARK_SPERMATOGENESIS                          | 109         | 0.37      | 1.52       | 0.028                | 0.240                | 0.501                 | 4608                   |
| 4 | HALLMARK_INTERFERON_ALPHA_RESPONSE                | 93          | 0.58      | 1.50       | 0.048                | 0.247                | 0.534                 | 9369                   |
| 5 | HALLMARK_KRAS_SIGNALING_DN                        | 157         | 0.40      | 1.45       | 0.033                | 0.199                | 0.591                 | 8602                   |

26  
27  
28  
29  
30

#### Enriched in NED patients

none

31 **Supplementary Table S5. Differentially expressed genes in PaC patients with**  vs   
 32 **Extrahepatic (EHM) metastasis, compared to NED.**

| UP-REGULATED |                  |                      | DOWN-REGULATED |                  |                      |
|--------------|------------------|----------------------|----------------|------------------|----------------------|
| Gene         | logFold $\Delta$ | Adj. <i>p</i> -value | Gene           | logFold $\Delta$ | Adj. <i>p</i> -value |
| LOXL4        | 3.38272757       | 0.095318788          | FGR            | 1.13773169       | 0.07501625           |
| IRF4         | 3.05077569       | 0.003874647          | HDX            | 1.13449732       | 0.049025534          |
| TMC4         | 2.67901617       | 0.06049485           | ADAMTS1        | 1.11776522       | 0.070805804          |
| GDNF         | 2.58310020       | 0.0408066            | PLK2           | 1.10538464       | 0.015380088          |
| IP6K3        | 2.46929398       | 0.051969902          | IFI16          | 1.09799465       | 0.053840123          |
| RASD1        | 2.45417477       | 0.011444336          | PPP1R18        | 1.08673207       | 0.090660286          |
| ETV7         | 2.32807078       | 0.01947401           | SOD2           | 1.07338711       | 0.042541574          |
| SLCO4A1      | 2.31051432       | 0.051846372          | MYO1G          | 1.01742132       | 0.086640108          |
| RGS9         | 2.27978933       | 0.000553294          | NCOA7          | 1.00610837       | 0.047486481          |
| DNAH5        | 2.26959019       | 0.015683479          |                |                  |                      |
| G0S2         | 2.12203885       | 0.014052084          |                |                  |                      |
| IL1RL1       | 2.07080291       | 0.015326322          |                |                  |                      |
| ADAMTS4      | 2.06763641       | 0.053840123          |                |                  |                      |
| ACKR3        | 2.01135817       | 0.006331992          |                |                  |                      |
| TMPRSS3      | 1.98596804       | 0.092234919          |                |                  |                      |
| NOD2         | 1.88500411       | 0.063128333          |                |                  |                      |
| KLHL29       | 1.85139859       | 0.004921512          |                |                  |                      |
| HAPLN3       | 1.81777801       | 0.047486481          |                |                  |                      |
| WIPF3        | 1.78243082       | 0.014052084          |                |                  |                      |
| IL1RN        | 1.76977354       | 0.08489918           |                |                  |                      |
| SLC11A1      | 1.75556083       | 0.079649249          | MYCL           | -1.08622412      | 0.051846372          |
| GFPT2        | 1.74654127       | 0.070805804          | EPB41L1        | -1.76927696      | 0.0408066            |
| MEFV         | 1.72660825       | 0.051846372          |                |                  |                      |
| MX1          | 1.72415493       | 0.024686976          |                |                  |                      |
| SLC22A15     | 1.72337457       | 0.049428133          |                |                  |                      |
| SYTL3        | 1.70267733       | 0.090172812          |                |                  |                      |
| ELF3         | 1.62126140       | 0.051846372          |                |                  |                      |
| FAT1         | 1.58798844       | 0.031110441          |                |                  |                      |
| RALGDS       | 1.55986995       | 0.080958875          |                |                  |                      |
| ADAMTS9      | 1.54308731       | 0.051846372          |                |                  |                      |
| ITGAX        | 1.50630327       | 0.06089242           |                |                  |                      |
| JAK3         | 1.50331742       | 0.019574209          |                |                  |                      |
| NR1D1        | 1.47209679       | 0.036581449          |                |                  |                      |
| TGFB3        | 1.40349814       | 0.006735664          |                |                  |                      |
| GOLM1        | 1.39660559       | 0.079569459          |                |                  |                      |
| MLKL         | 1.39267168       | 0.014052084          |                |                  |                      |
| PFKP         | 1.38184003       | 0.047486481          |                |                  |                      |
| RUNX1        | 1.36637315       | 0.017375988          |                |                  |                      |
| IFI6         | 1.30472579       | 0.066651409          |                |                  |                      |
| HK2          | 1.30132979       | 0.021253867          |                |                  |                      |
| ARNTL2       | 1.29264807       | 0.004921512          |                |                  |                      |
| CDC7         | 1.28358455       | 0.015683479          |                |                  |                      |
| MCAM         | 1.22123274       | 0.076183944          |                |                  |                      |
| OSMR         | 1.21735998       | 0.014052084          |                |                  |                      |
| CD274        | 1.21256674       | 0.026981961          |                |                  |                      |
| YBX3         | 1.17807169       | 0.037576482          |                |                  |                      |
| MTHFD2       | 1.15081395       | 0.051969902          |                |                  |                      |
| EMR2         | 1.15049637       | 0.049258092          |                |                  |                      |

33 Comparisons performed with the Wald test implemented using the DESeq2 package, with adjustment for multiple  
 34 comparisons.

35 **Supplementary Table S6. Gene set enrichment analysis (GSEA) in bulk liver**  
 36 **specimens of PaC patients comparing patients with distant extrahepatic**  
 37 **metastasis (EHM) to those with no evidence of disease (NED)**

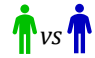

38  
39 **A. Enriched in EHM**

|    | <b>Gene Set</b><br><i>(follow link to MSigDB)</i>          | <b>SIZE</b> | <b>ES</b> | <b>NES</b> | <b>NOM p-val</b> | <b>FDR q-val</b> | <b>FWER p-val</b> | <b>RANK AT MAX</b> |
|----|------------------------------------------------------------|-------------|-----------|------------|------------------|------------------|-------------------|--------------------|
| 1  | <a href="#">HALLMARK TNFA SIGNALING VIA NFKB</a>           | 197         | 0.66      | 3.25       | 0.000            | 0.000            | 0.000             | 6265               |
| 2  | <a href="#">HALLMARK INTERFERON GAMMA RESPONSE</a>         | 197         | 0.65      | 3.22       | 0.000            | 0.000            | 0.000             | 5673               |
| 3  | <a href="#">HALLMARK INTERFERON ALPHA RESPONSE</a>         | 93          | 0.66      | 2.90       | 0.000            | 0.000            | 0.000             | 5430               |
| 4  | <a href="#">HALLMARK IL6 JAK STAT3 SIGNALING</a>           | 81          | 0.67      | 2.85       | 0.000            | 0.000            | 0.000             | 3712               |
| 5  | <a href="#">HALLMARK INFLAMMATORY RESPONSE</a>             | 194         | 0.54      | 2.63       | 0.000            | 0.000            | 0.000             | 7092               |
| 6  | <a href="#">HALLMARK ALLOGRAFT REJECTION</a>               | 191         | 0.49      | 2.38       | 0.000            | 0.000            | 0.000             | 8198               |
| 7  | <a href="#">HALLMARK P53 PATHWAY</a>                       | 188         | 0.46      | 2.26       | 0.000            | 0.000            | 0.000             | 7889               |
| 8  | <a href="#">HALLMARK APOPTOSIS</a>                         | 158         | 0.46      | 2.20       | 0.000            | 0.000            | 0.000             | 5905               |
| 9  | <a href="#">HALLMARK IL2 STAT5 SIGNALING</a>               | 193         | 0.43      | 2.13       | 0.000            | 0.000            | 0.000             | 7585               |
| 10 | <a href="#">HALLMARK HYPOXIA</a>                           | 186         | 0.44      | 2.11       | 0.000            | 0.000            | 0.000             | 5617               |
| 11 | <a href="#">HALLMARK KRAS SIGNALING UP</a>                 | 189         | 0.43      | 2.09       | 0.000            | 0.000            | 0.000             | 6650               |
| 12 | <a href="#">HALLMARK COMPLEMENT</a>                        | 197         | 0.41      | 2.03       | 0.000            | 0.000            | 0.000             | 7079               |
| 13 | <a href="#">HALLMARK G2M CHECKPOINT</a>                    | 189         | 0.41      | 2.01       | 0.000            | 0.000            | 0.000             | 10219              |
| 14 | <a href="#">HALLMARK MITOTIC SPINDLE</a>                   | 197         | 0.39      | 1.92       | 0.000            | 0.000            | 0.001             | 9694               |
| 15 | <a href="#">HALLMARK EPITHELIAL MESENCHYMAL TRANSITION</a> | 194         | 0.39      | 1.92       | 0.000            | 0.000            | 0.001             | 7825               |
| 16 | <a href="#">HALLMARK TGF BETA SIGNALING</a>                | 54          | 0.48      | 1.92       | 0.002            | 0.000            | 0.001             | 7053               |
| 17 | <a href="#">HALLMARK APICAL JUNCTION</a>                   | 186         | 0.39      | 1.89       | 0.000            | 0.000            | 0.001             | 6808               |
| 18 | <a href="#">HALLMARK E2F TARGETS</a>                       | 195         | 0.39      | 1.89       | 0.000            | 0.000            | 0.001             | 8850               |
| 19 | <a href="#">HALLMARK ESTROGEN RESPONSE EARLY</a>           | 192         | 0.37      | 1.80       | 0.000            | 0.001            | 0.009             | 6762               |
| 20 | <a href="#">HALLMARK UV RESPONSE UP</a>                    | 151         | 0.37      | 1.76       | 0.000            | 0.001            | 0.014             | 5821               |
| 21 | HALLMARK_PI3K_AKT_MTOR_SIGNALING                           | 100         | 0.37      | 1.67       | 0.002            | 0.003            | 0.041             | 8260               |
| 22 | HALLMARK_HEME_METABOLISM                                   | 188         | 0.34      | 1.65       | 0.000            | 0.003            | 0.050             | 5492               |
| 23 | HALLMARK_MTORC1_SIGNALING                                  | 195         | 0.33      | 1.62       | 0.000            | 0.004            | 0.067             | 5792               |
| 24 | HALLMARK_UV_RESPONSE_DN                                    | 138         | 0.34      | 1.59       | 0.002            | 0.007            | 0.099             | 6985               |
| 25 | HALLMARK_MYC_TARGETS_V2                                    | 58          | 0.39      | 1.58       | 0.018            | 0.007            | 0.117             | 8175               |
| 26 | HALLMARK_UNFOLDED_PROTEIN_RESPONSE                         | 107         | 0.35      | 1.55       | 0.008            | 0.009            | 0.146             | 8967               |
| 27 | HALLMARK_ANGIOGENESIS                                      | 36          | 0.41      | 1.49       | 0.035            | 0.016            | 0.244             | 8477               |
| 28 | HALLMARK_SPERMATOGENESIS                                   | 109         | 0.29      | 1.31       | 0.050            | 0.086            | 0.807             | 4115               |

40

41 **B. Enriched in NED**

|   | <b>Gene Set</b><br><i>(follow link to MSigDB)</i>  | <b>SIZE</b> | <b>ES</b> | <b>NES</b> | <b>NOM p-val</b> | <b>FDR q-val</b> | <b>FWER p-val</b> | <b>RANK AT MAX</b> |
|---|----------------------------------------------------|-------------|-----------|------------|------------------|------------------|-------------------|--------------------|
| 1 | <a href="#">HALLMARK BILE ACID METABOLISM</a>      | 112         | -0.50     | -2.39      | 0.000            | 0.000            | 0.000             | 7867               |
| 2 | <a href="#">HALLMARK OXIDATIVE PHOSPHORYLATION</a> | 183         | -0.43     | -2.19      | 0.000            | 0.000            | 0.000             | 9947               |
| 3 | <a href="#">HALLMARK FATTY ACID METABOLISM</a>     | 152         | -0.37     | -1.83      | 0.000            | 0.000            | 0.005             | 8044               |
| 4 | <a href="#">HALLMARK PEROXISOME</a>                | 101         | -0.35     | -1.61      | 0.006            | 0.004            | 0.050             | 8207               |
| 5 | <a href="#">HALLMARK XENOBIOTIC METABOLISM</a>     | 194         | -0.29     | -1.47      | 0.002            | 0.017            | 0.222             | 8071               |

42 **Supplementary Table S7. Gene set enrichment analysis (GSEA) in bulk liver**  
 43 **specimens of PaC patients comparing patients with late liver metastasis (LiM>6)**  
 44 **to those with no evidence of disease (NED)**

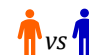

45  
46 **A. Enriched in LiM>6**

|    | <b>Gene Set</b><br><i>(follow link to MSigDB)</i> | <b>SIZE</b> | <b>ES</b> | <b>NES</b> | <b>NOM<br/>p-val</b> | <b>FDR<br/>q-val</b> | <b>FWER<br/>p-val</b> | <b>RANK<br/>AT MAX</b> |
|----|---------------------------------------------------|-------------|-----------|------------|----------------------|----------------------|-----------------------|------------------------|
| 1  | <a href="#">HALLMARK_E2F_TARGETS</a>              | 195         | 0.45      | 2.22       | 0.000                | 0.000                | 0.000                 | 8005                   |
| 2  | <a href="#">HALLMARK_G2M_CHECKPOINT</a>           | 189         | 0.46      | 2.19       | 0.000                | 0.000                | 0.000                 | 7703                   |
| 3  | <a href="#">HALLMARK_P53_PATHWAY</a>              | 188         | 0.37      | 1.78       | 0.000                | 0.004                | 0.006                 | 6173                   |
| 4  | <a href="#">HALLMARK_PI3K_AKT_MTOR_SIGNALING</a>  | 100         | 0.40      | 1.77       | 0.000                | 0.003                | 0.006                 | 9682                   |
| 5  | <a href="#">HALLMARK_MITOTIC_SPINDLE</a>          | 197         | 0.33      | 1.62       | 0.000                | 0.019                | 0.046                 | 8619                   |
| 6  | <a href="#">HALLMARK_MYC_TARGETS_V1</a>           | 194         | 0.33      | 1.60       | 0.000                | 0.019                | 0.058                 | 8745                   |
| 7  | HALLMARK_GLYCOLYSIS                               | 195         | 0.31      | 1.50       | 0.003                | 0.047                | 0.158                 | 7230                   |
| 8  | HALLMARK_HEME_METABOLISM                          | 188         | 0.31      | 1.50       | 0.003                | 0.041                | 0.158                 | 7295                   |
| 9  | HALLMARK_ESTROGEN_RESPONSE_EARLY                  | 192         | 0.30      | 1.46       | 0.003                | 0.053                | 0.225                 | 4582                   |
| 10 | HALLMARK_REACTIVE_OXYGEN_SPECIES_PATHWAY          | 47          | 0.38      | 1.44       | 0.030                | 0.055                | 0.259                 | 4132                   |
| 11 | HALLMARK_SPERMATOGENESIS                          | 109         | 0.32      | 1.43       | 0.018                | 0.051                | 0.265                 | 3581                   |
| 12 | HALLMARK_ANDROGEN_RESPONSE                        | 94          | 0.33      | 1.42       | 0.015                | 0.054                | 0.299                 | 5413                   |
| 13 | HALLMARK_HYPOXIA                                  | 186         | 0.29      | 1.40       | 0.011                | 0.058                | 0.344                 | 7008                   |
| 14 | HALLMARK_KRAS_SIGNALING_DN                        | 157         | 0.28      | 1.32       | 0.025                | 0.114                | 0.576                 | 5822                   |

47

48 **B. Enriched in NED**

|   | <b>Gene Set</b><br><i>(follow link to MSigDB)</i> | <b>SIZE</b> | <b>ES</b> | <b>NES</b> | <b>NOM<br/>p-val</b> | <b>FDR<br/>q-val</b> | <b>FWER<br/>p-val</b> | <b>RANK<br/>AT MAX</b> |
|---|---------------------------------------------------|-------------|-----------|------------|----------------------|----------------------|-----------------------|------------------------|
| 1 | <a href="#">HALLMARK_BILE_ACID_METABOLISM</a>     | 112         | -0.36     | -1.53      | 0.005                | 0.084                | 0.177                 | 9458                   |

49

50

51

52 **Supplementary Table S8. Clinicopathological characteristics of patients subjected to single-**  
 53 **cell RNA sequencing of hepatic CD45<sup>+</sup> cells.**

| Variable                                     | Non-PaC |           | PaC                           |             |
|----------------------------------------------|---------|-----------|-------------------------------|-------------|
|                                              |         | %         |                               | %           |
| <b>Patients in group</b>                     | 3       |           | 5                             |             |
| <b>Male</b>                                  | 1       | 33%       | 5                             | 100%        |
| <b>Age - Median (Range)</b>                  | 65.1    | (52.3-70) | 66.9                          | (58.6-84.1) |
| <b>Biliary obstruction*</b>                  | 0       | 0%        | 3                             | 60%         |
| <b>Preop. Biliary drainage</b>               | 0       | 0%        | 2                             | 40%         |
| <b>Histologic subtype</b>                    |         |           |                               |             |
| IPMN                                         | 1       | 33%       | Conventional PDAC             | 3 60%       |
| Low grade PaNET                              | 1       | 33%       | Adenosquamous PDAC            | 1 20%       |
| Ampullary adenoma                            | 1       | 33%       | Pancreatobiliary Ca           | 1 20%       |
| <b>IPMN Grade</b>                            |         |           |                               |             |
| Low                                          | 1       | 100%      | <b>PaC Differentiation</b>    |             |
| Intermediate                                 | 0       | 0%        | Well                          | 0 0%        |
| High                                         | 0       | 0%        | Moderate                      | 4 80%       |
|                                              |         |           | Poor                          | 1 20%       |
| <b>T-stage (per AJCC 8<sup>th</sup> ed.)</b> |         |           |                               |             |
|                                              |         |           | 1 (≤2cm)                      | 1 20%       |
|                                              |         |           | 2 (>2 and ≤4cm)               | 3 60%       |
|                                              |         |           | 3 (>4cm)                      | 1 20%       |
|                                              |         |           | 4 (invasion of great vessels) | 0 0%        |
| <b>N-stage (per AJCC 8<sup>th</sup> ed.)</b> |         |           |                               |             |
|                                              |         |           |                               | 32          |
|                                              |         |           | 0 (LN -ve)                    | 3 60%       |
|                                              |         |           | 1 (1-3 +ve LNs)               | 2 40%       |
|                                              |         |           | 2 (>3 +ve LNs)                | 0 0%        |
| <b>Lymphovascular invasion</b>               | -       |           | 4                             | 80%         |
| <b>Perineural invasion</b>                   | -       |           | 4                             | 80%         |

54 IPMN: Intraductal papillary mucinous neoplasm; PaNET: Pancreatic neuroendocrine tumor

55

56

57 **Supplementary Table S9. Genes deregulated in T cell cluster by scRNAseq.**

| <b>UP-REGULATED</b> |                      | <b>DOWN-REGULATED</b> |                      |
|---------------------|----------------------|-----------------------|----------------------|
| Gene                | Adj. <i>p</i> -value | Gene                  | Adj. <i>p</i> -value |
| RPS4Y1              | 0                    | HOPX                  | 6.88E-24             |
| MIR24-2             | 3.62E-46             | FGFBP2                | 4.01E-17             |
| CEBPD               | 4.66E-60             | RPS4X                 | 1.09E-166            |
| CD8A                | 9.29E-103            | CCL3                  | 0.02023019           |
| KLF6                | 4.52E-57             | RPL17                 | 6.00E-72             |
| CD8B                | 1.67E-50             | ZNF90                 | 1.36E-44             |
| CD27                | 4.40E-47             | RPSAP58               | 1.71E-57             |
| SPOCK2              | 9.38E-40             | LGALS1                | 7.35E-24             |
| DUSP4               | 3.53E-41             | RPL36A                | 2.81E-121            |
| RGCC                | 1.88E-15             | EIF5A                 | 4.56E-56             |
| MYADM               | 2.65E-27             | RPS10                 | 3.77E-156            |
| HIST1H4C            | 3.68E-29             | KLRF1                 | 5.42E-35             |
| APOBEC3G            | 2.54E-28             | IFITM1                | 5.34E-81             |
| ITM2C               | 6.10E-25             | CCL3L1                | 9.08E-09             |
| AMICA1              | 1.72E-25             | NBEAL1                | 1.50E-117            |
| H1FX                | 3.45E-28             | MT2A                  | 1                    |
| CTSW                | 5.56E-46             | RPS26                 | 0                    |
| EIF1AY              | 3.49E-42             | XCL1                  | 5.87E-45             |
| CD97                | 9.52E-22             | IFNG                  | 3.15E-43             |
| RNF213              | 2.09E-31             | MT1X                  | 7.86E-06             |
| ERAP2               | 2.09E-35             | XCL2                  | 2.21E-53             |
| SNORD3B-2           | 1.35E-38             | XIST                  | 0                    |
| KIAA1551            | 3.95E-24             | GNLY                  | 5.84E-75             |
| KLRG1               | 1.01E-20             |                       |                      |
| CXCR4               | 3.51E-33             |                       |                      |

58 Analysis was performed using the Wilcoxon's rank sum test. P-values are provided after adjustment for multiple  
59 comparisons with the Bonferroni method.

60

61 **Supplementary Table S10. Features included in the four models predicting each metastatic**  
 62 **outcome.**

| <b>Model</b> | <b>Prediction</b>                                   | <b>Included features</b>                                                                                                                                                                                                                                    |
|--------------|-----------------------------------------------------|-------------------------------------------------------------------------------------------------------------------------------------------------------------------------------------------------------------------------------------------------------------|
| m1           | Liver metastasis (LiM>6mo)                          | <ul style="list-style-type: none"> <li>• CD45+ cell count IHC</li> <li>• CD8+ T cell lobular infiltration IHC – manual score [Scattered vs (Few/Widespread)]</li> <li>• SORT1 gene</li> <li>• IRF4 gene</li> <li>• Liver creatine (metabolomics)</li> </ul> |
| m2           | Early LiM (LiM<6mo)                                 | <ul style="list-style-type: none"> <li>• NET area (IF)</li> <li>• NR1D1 gene</li> <li>• SORT1 gene</li> </ul>                                                                                                                                               |
| m3           | Distant extrahepatic (EHM)                          | <ul style="list-style-type: none"> <li>• RGS9 gene</li> <li>• NR1D1 gene</li> <li>• OSMR gene</li> <li>• PPP1R18 gene</li> </ul>                                                                                                                            |
| m4           | No evidence of disease (NED) for at least 21 months | <ul style="list-style-type: none"> <li>• IBA1+ cell portal infiltration IHC – manual score [(Mod/Severe) vs (Absent/Scattered/Mild)]</li> <li>• RGS9 gene</li> </ul>                                                                                        |

63 IHC, Immunohistochemistry; IF, Immunofluorescence

64



65 **Supplementary Table S11. Prediction of individual patient output using the combined**  
 66 **model (N=41).**

| ID   | 1 <sup>st</sup> Recur. Site | Time to 1 <sup>st</sup> Recur (mo) | LiM | Time to LiM or Length of follow up (mo) | Actual Recur. Pattern | Predicted Recur. Pattern | Remarks                                                                                                                             |
|------|-----------------------------|------------------------------------|-----|-----------------------------------------|-----------------------|--------------------------|-------------------------------------------------------------------------------------------------------------------------------------|
| PT3  | Liver                       | 4.5                                | Yes | 4.5                                     | Early LiM             | Early LiM                |                                                                                                                                     |
| PT6  | Liver                       | 4.1                                | Yes | 4.1                                     | Early LiM             | Early LiM                |                                                                                                                                     |
| PT9  | Liver                       | 1.3                                | Yes | 1.3                                     | Early LiM             | Early LiM                |                                                                                                                                     |
| PT11 | Liver                       | 1.8                                | Yes | 1.8                                     | Early LiM             | Early LiM                |                                                                                                                                     |
| PT34 | Liver                       | 4.5                                | Yes | 4.5                                     | Early LiM             | Early LiM                |                                                                                                                                     |
| PT43 | Liver                       | 1.6                                | Yes | 1.6                                     | Early LiM             | NED                      |                                                                                                                                     |
| PT53 | Liver + Lung                | 3.2                                | Yes | 3.2                                     | Early LiM             | Early LiM                | Synchronous EHM and LiM                                                                                                             |
| PT58 | Liver                       | 1.2                                | Yes | 1.2                                     | Early LiM             | Early LiM                |                                                                                                                                     |
| PT67 | Liver                       | 5.9                                | Yes | 5.9                                     | Early LiM             | Early LiM                |                                                                                                                                     |
| PT78 | Liver                       | 1.8                                | Yes | 1.8                                     | Early LiM             | Early LiM                |                                                                                                                                     |
| PT1  | Liver                       | 8.3                                | Yes | 8.3                                     | Late LiM              | Late LiM                 |                                                                                                                                     |
| PT13 | Liver + Local               | 7.3                                | Yes | 7.3                                     | Late LiM              | Late LiM                 |                                                                                                                                     |
| PT16 | Liver                       | 8.4                                | Yes | 8.4                                     | Late LiM              | Early LiM                | LiM at 8.4mo detected by PET, not visible on CT before or after PET but may have been present earlier than performance of PET       |
| PT23 | Liver + Local               | 32.3                               | Yes | 32.3                                    | Late LiM              | Late LiM                 | Synchronous EHM and LiM                                                                                                             |
| PT27 | Lung, then Liver            | 4.2                                | Yes | 9.6                                     | Late LiM              | NED                      | Initially found to have multiple sub-centimeter lung nodules, which progressed, with development of lymph node and liver metastases |
| PT32 | Cervical LN, then Liver     | 8.7                                | Yes | 10.1                                    | Late LiM              | Late LiM                 | Cervical LN identified by palpation at 8.7mo (biopsy-confirmed), then found to have multiple LiM on CT at 10mo                      |
| PT49 | Liver                       | 9.8                                | Yes | 9.8                                     | Late LiM              | Late LiM                 |                                                                                                                                     |
| PT57 | Liver                       | 10.4                               | Yes | 10.4                                    | Late LiM              | Late LiM                 |                                                                                                                                     |
| PT64 | Liver                       | 11.3                               | Yes | 11.3                                    | Late LiM              | Late LiM                 |                                                                                                                                     |
| PT71 | Liver                       | 17.2                               | Yes | 17.2                                    | Late LiM              | Late LiM                 |                                                                                                                                     |
| PT76 | Liver + Spleen              | 7.2                                | Yes | 7.2                                     | Late LiM              | Late LiM                 |                                                                                                                                     |
| PT77 | Liver                       | 19.6                               | Yes | 19.6                                    | Late LiM              | Late LiM                 |                                                                                                                                     |
| PT85 | Liver + Local               | 6.0                                | Yes | 6.0                                     | Late LiM              | EHM                      |                                                                                                                                     |
| PT2  | Peritoneum                  | 13.8                               | No  | 35.6                                    | EHM                   | EHM                      |                                                                                                                                     |
| PT10 | Peritoneum                  | 22.0                               | No  | 22.1                                    | EHM                   | EHM                      |                                                                                                                                     |
| PT37 | Lung                        | 1.9                                | No  | 15.7                                    | EHM                   | EHM                      |                                                                                                                                     |
| PT46 | Lung                        | 4.3                                | No  | 4.3                                     | EHM                   | EHM                      | Patient died at 6.9mo                                                                                                               |
| PT47 | Lung                        | 11.4                               | No  | 25.5                                    | EHM                   | Early LiM                |                                                                                                                                     |
| PT48 | Peritoneum                  | 14.2                               | No  | 26.1                                    | EHM                   | EHM                      |                                                                                                                                     |
| PT75 | Lung                        | 17.9                               | No  | 36.0                                    | EHM                   | Late LiM                 |                                                                                                                                     |
| PT84 | Lung                        | 34.4                               | No  | 34.4                                    | EHM                   | EHM                      |                                                                                                                                     |
| PT91 | Local + LN + Peritoneum     | 7.5                                | No  | 15.9                                    | EHM                   | Late LiM                 |                                                                                                                                     |
| PT7  | None                        | -                                  | No  | 36.0                                    | NED                   | NED                      |                                                                                                                                     |
| PT14 | None                        | -                                  | No  | 36.0                                    | NED                   | NED                      |                                                                                                                                     |
| PT15 | None                        | -                                  | No  | 34.7                                    | NED                   | NED                      |                                                                                                                                     |
| PT24 | None                        | -                                  | No  | 35.3                                    | NED                   | Early LiM                |                                                                                                                                     |
| PT30 | None                        | -                                  | No  | 35.2                                    | NED                   | NED                      |                                                                                                                                     |
| PT41 | None                        | -                                  | No  | 36.0                                    | NED                   | NED                      |                                                                                                                                     |
| PT44 | None                        | -                                  | No  | 36.0                                    | NED                   | Late LiM                 |                                                                                                                                     |
| PT50 | None                        | -                                  | No  | 36.0                                    | NED                   | NED                      |                                                                                                                                     |
| PT65 | None                        | -                                  | No  | 20.6                                    | NED                   | NED                      |                                                                                                                                     |

67 **Supplementary Table S12. Antibodies used for IMC.**

| <b>Epitope</b> | <b>Metal tag</b> | <b>Antibody vendor</b>    | <b>Antibody catalog</b> | <b>Antibody clone</b>  | <b>Antibody lot</b> | <b>Antibody dilution</b> |
|----------------|------------------|---------------------------|-------------------------|------------------------|---------------------|--------------------------|
| Histone H3     | In113            | Cell Signaling Technology | 4499BF                  | D1H2                   | 17                  | 1:400                    |
| FOXP3          | Gd155            | Invitrogen                | 14-4777-82              | 236A/E7                | 2378013             | 1:25                     |
| CD4            | Gd156            | Abcam                     | ab181724                | EPR6855                | GR3285644-12        | 1:50                     |
| NKG2A          | Tb159            | Abcam                     | ab273516                | EPR23737-127           | GR3410074-2         | 1:25                     |
| CD8a           | Dy162            | eBioscience               | 14-0085-82              | C8/144B                | 2132595             | 1:100                    |
| ARG1           | Dy164            | Cell Signalling           | 89872SF                 | D4E3M                  | 1                   | 1:50                     |
| CD3            | Er170            | Fluidigm                  | 3170019D                | Polyclonal. C-Terminal | 2202221-16          | 1:100                    |
| TRDC           | Yb171            | Santa Cruz                | sc-100289               | H-41                   | L1321               | 1:50                     |
| KRT8/18        | Yb174            | Fluidigm                  | 3174022D                | C51                    | 372007              | 1:100                    |
| DNA1           | Ir191            | Fluidigm                  | 201192B                 | DNA intercalator       |                     | 1:300                    |
| DNA2           | Ir193            | Fluidigm                  | 201192B                 | DNA intercalator       |                     | 1:300                    |

68
